# Supplementary material for: Esc peptides and derivatives potentiate the activity of CFTR with gating defects and display antipseudomonal activity in cystic fibrosis-like lung disease
Source: Springer Nature journal article supplement (doi:10.1007/s00018-025-05633-9), 2025-03-18
Supplement: MOESM1 [file 18_2025_5633_MOESM1_ESM.pdf]

## Supplementary Information

### Esc peptides and derivatives potentiate the activity of CFTR with gating defects and display antipseudomonal activity in cystic fibrosis-like lung disease

Loretta Ferrera<sup>1</sup>, Floriana Cappiello<sup>2</sup>, Arianna Venturini<sup>3</sup>, Hexin Lu<sup>4</sup>, Bruno Casciaro<sup>2</sup>, Giacomo Cappella<sup>2</sup>, Giulio Bontempi<sup>5</sup>, Alessandra Corrente<sup>2</sup>, Raffaele Strippoli<sup>6</sup>, Federico Zara<sup>1,7</sup>, Y. Peter Di<sup>4\*</sup>, Luis J.V. Galiotta<sup>3,8</sup>, Mattia Mori<sup>9\*</sup> and Maria Luisa Mangoni<sup>2\*</sup>

<sup>1</sup>UOC Genetica Medica, IRCCS Istituto Giannina Gaslini, Genoa, Italy;

<sup>2</sup>Laboratory Affiliated to Pasteur Italia-Fondazione Cenci Bolognietti, Department of Biochemical Sciences, Sapienza University of Rome, Rome, Italy;

<sup>3</sup>Telethon Institute of Genetics and Medicine (TIGEM), Pozzuoli, Naples Italy;

<sup>4</sup>Department of Environmental and Occupational Health, University of Pittsburgh, Pittsburgh, USA;

<sup>5</sup>Department of Molecular Medicine, Sapienza University of Rome, Rome, Italy;

<sup>6</sup>National Institute for Infectious Diseases L. Spallanzani, IRCCS, Via Portuense, 292, 00149 Rome, Italy

<sup>7</sup>Department of Neurosciences, Rehabilitation, Ophthalmology, Genetics, Maternal and Child Health (DiNOGMI), University of Genoa, Genoa, Italy

<sup>8</sup>Department of Translational Medical Sciences, University of Napoli “Federico II”, Naples, Italy;

<sup>9</sup>Department of Biotechnology, Chemistry and Pharmacy, University of Siena, Siena, Italy.

\* Corresponding authors:

Maria Luisa Mangoni; Email: [marialuisa.mangoni@uniroma1.it](mailto:marialuisa.mangoni@uniroma1.it)

Mattia Mori; Email: [mattia.mori@unisi.it](mailto:mattia.mori@unisi.it)

Y. Peter Di; [peterdi@pitt.edu](mailto:peterdi@pitt.edu)

#### This PDF file includes:

Supplementary Text

Fig. S1

Fig. S2

## Supplementary Text

Patch-clamp experiments in FRT cells. Whole-cell membrane currents were recorded in FRT cells expressing G551D and G1349D CFTR by using the same experimental solutions and stimulation protocols as described in the main text.

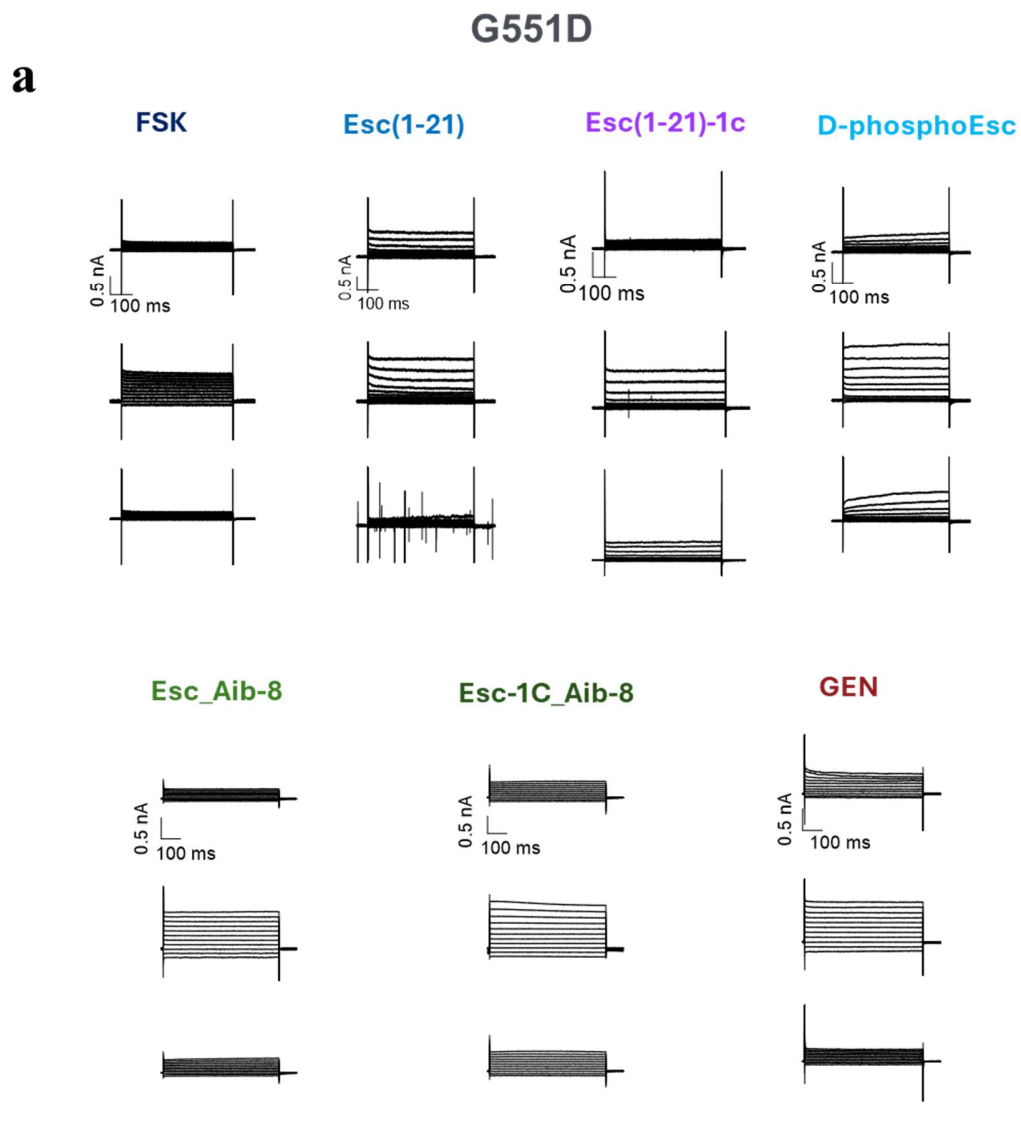

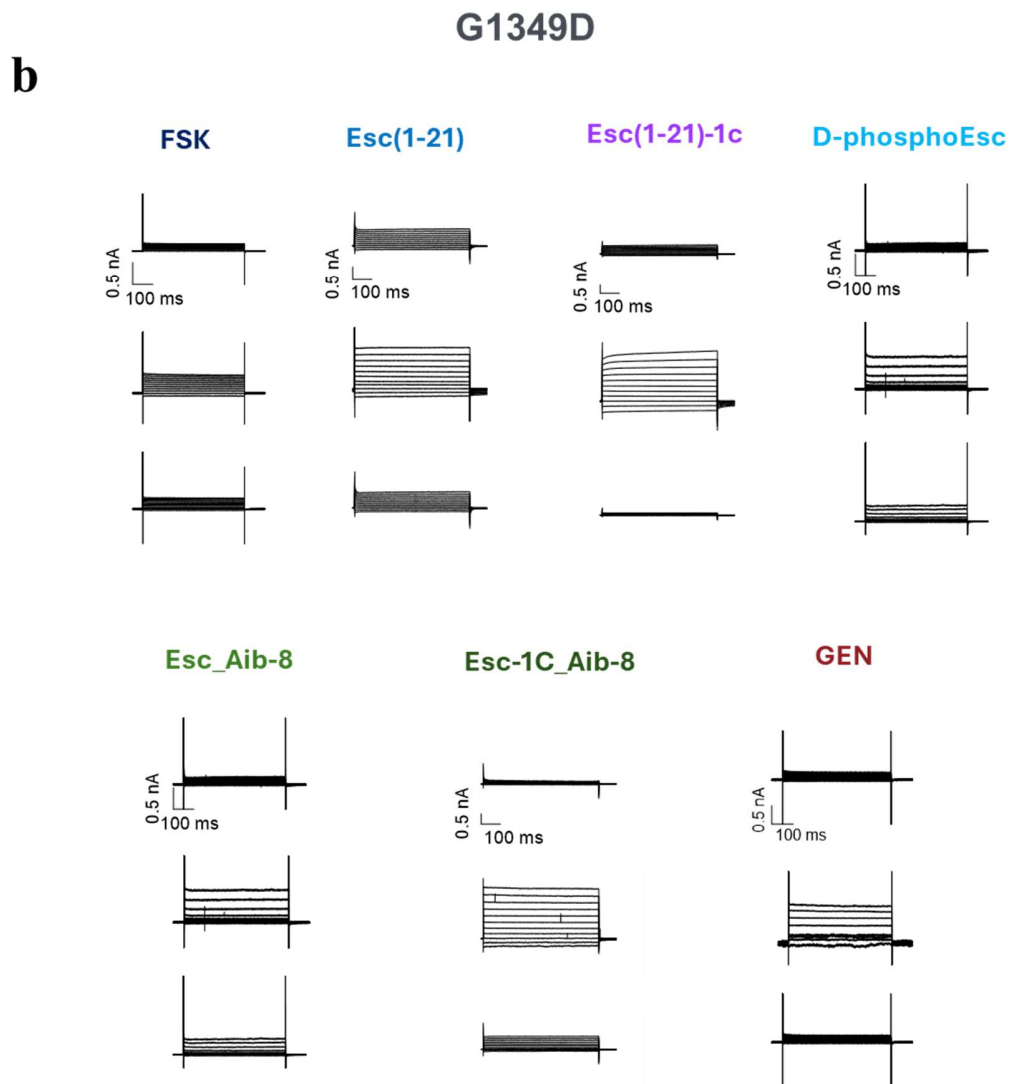

**Fig. S1.** Representative whole-cell membrane currents from patch-clamp experiments in G551D (a) and G1349D-FRT (b) cells. The figure shows superimposed currents elicited at membrane potentials in the range -100 to +100 mV in the control external solution (top panel), after application of 20  $\mu$ M FSK alone or FSK + 10  $\mu$ M peptides/GEN, as indicated (central panel) and after application of 10  $\mu$ M Inhibitor 172 (bottom panel)

The effect of FSK alone or FSK plus each peptide on the intracellular calcium ions evaluated by the Fluo-4 assay in null FRT cells.

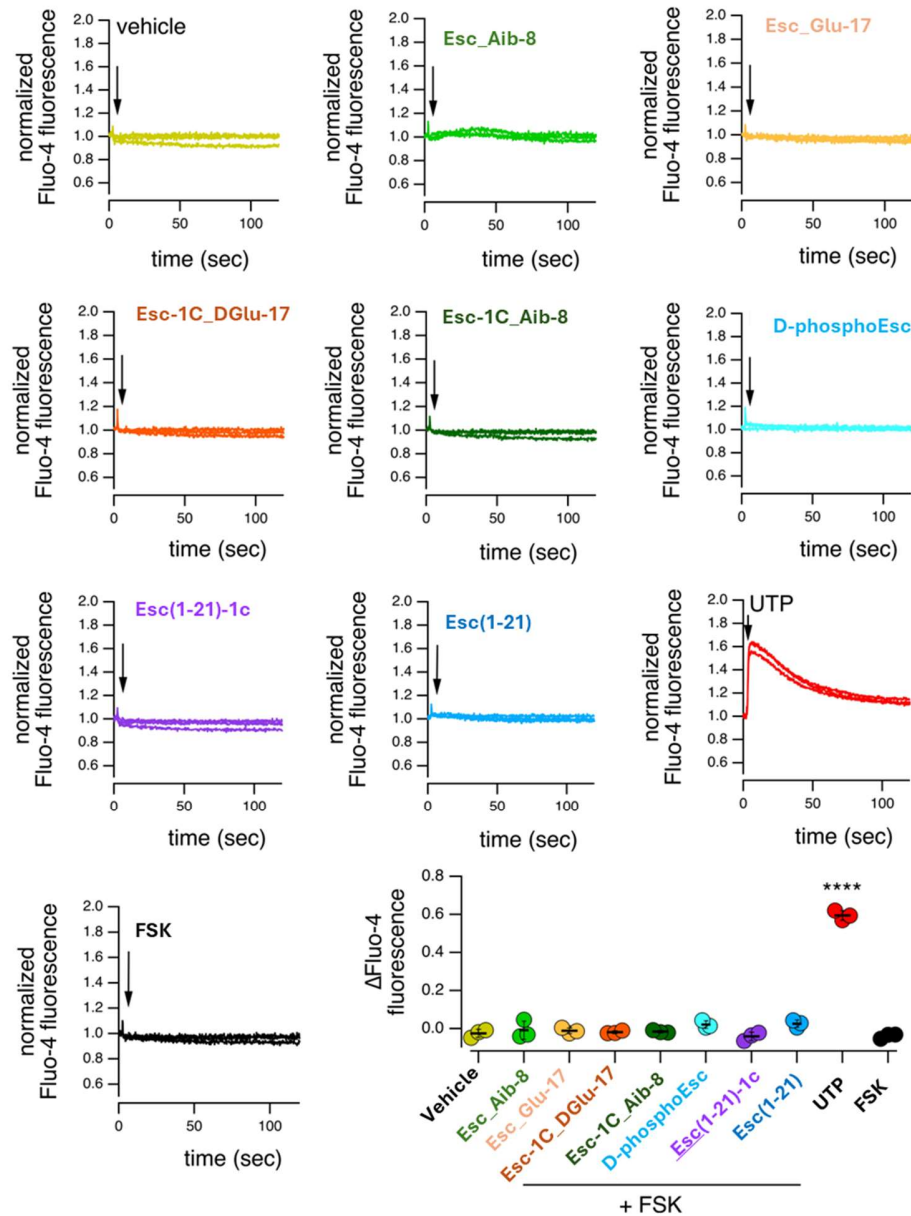

**Fig. S2.** Effect of peptides on intracellular calcium in the presence of FSK. Every trace in the graphs represents a single replicate for each condition and reflects calcium variation during time (measured with the calcium-sensitive fluorescent probe Fluo-4). Traces show the time course of normalized fluorescence (to the background) following addition (arrows) of vehicle (DMSO), peptides (10  $\mu$ M each) plus FSK (20  $\mu$ M), FSK alone (20  $\mu$ M), or UTP (10  $\mu$ M). The scatter dot plot on the bottom summarizes all the experiments and shows the maximal fluorescence change for each stimulus. \*\*\*\*  $p < 0.0001$  versus vehicle
